# Supplementary material for: Meteorology-normalized impact of COVID-19 lockdown upon NO 2 pollution in Spain
Source: Copernicus journal article supplement (doi:10.5194/acp-2020-446), 2020-05-25
Supplement: Supplementary file [file acp-2020-446-AC2-supplement.pdf]

## Reviewer #1

Comments from the reviewer are in blue, and answers in black (text citations and modifications are highlighted in italics). Note that following the recommendation of the other reviewer, we added three new meteorological features (surface net solar radiation, surface solar radiation downwards, downward UV radiation at the surface) and updated all the figures, tables and corresponding text. The impact on the results is relatively small so the discussion remains essentially the same.

The article under review here aims to quantify the impact of the Covid-19 lockdown measures in Spain on air quality. The topic is interesting from the point of view of air quality practitioners and the general public, but it also raises substantial scientific challenges. Even if economic activities were substantially reduced during the lock down period, the impact of meteorological factors on air quality precludes a simple comparison with previous years. Instead, the authors mobilize innovative machine learning approaches to tackle the issue. The quality of the presentation, scientific quality, and societal relevance are excellent, and publication in ACP is therefore recommended. I am nevertheless proposing the following minor suggestions that could help further strengthen the paper.

We are thankful to the reviewer for his/her positive feedbacks and comments.

### General comment:

The authors should be encouraged to extend the coverage of their study. Applying the method over the whole of Europe is certainly the scope for another paper. But an extension of the temporal coverage up to the end of the lockdown in Spain would be interesting.

We agree that an extension over Europe is interesting, and we are currently collaborating on another study addressing the question at this larger scale (focusing on the largest European cities). Concerning the extension of the temporal coverage of the present study, we took into account the time period with data available at the time of preparation/submission of this study. Although it would have been nice to cover the entire period of the lockdown, we are here considering a period already quite extended (41 days), comprising the most stringent phase of the lockdown. To our opinion, although interesting, extending the study would require to substantially reshape the first draft, without bringing much more scientific knowledge. In addition, even at the time of this revision (August 25<sup>th</sup>), the situation cannot be considered as normal since many people across Spain are still working from home in Spain (and some parts of the country have been recently confined again).

### Specific comments:

- L24, L403: the coronavirus is SARS-COV-2 not COVID-19. Indeed, the reviewer is right, according to the World Health Organization, COVID-19 designates the coronavirus disease, while SARS-COV-2 refers to the virus itself. To be consistent with this terminology, we added the term “*disease*” in the text.
- L36: without supporting reference, it is wiser to state that “the impact on industry is \*presumably\* more contrasted”. Corrected.

- L50: in the motivation of the work, the authors could add that this type of analysis will serve to validate the model-based assessment using emission scenarios derived from activity data during the lockdown. We added in the conclusion : *“The results of the present study provide a valuable reference for validating similar assessments of the impact of the COVID-19 lockdown on air quality based on chemistry transport models and emission scenarios derived from activity data during the lockdown (e.g. Guevara et al., 2020a; Menut et al., 2020).”* with the corresponding references :

  - Menut, L., Bessagnet, B., Siour, G., Mailler, S., Pennel, R., and Cholakian, A.: Impact of lockdown measures to combat Covid-19 on air quality over western Europe, *Science of The Total Environment*, 741, 140–426, <https://doi.org/10.1016/j.scitotenv.2020.140426>, <https://linkinghub.elsevier.com/retrieve/pii/S0048969720339486>, 2020.
  - Guevara, M., Jorba, O., Soret, A., Petetin, H., Bowdalo, D., Serradell, K., Tena, C., Denier van der Gon, H., Kuenen, J., Peuch, V.-H., and Pérez García-Pando, C.: Time-resolved emission reductions for atmospheric chemistry modelling in Europe during the COVID-19 lockdowns (in review), *Atmospheric Chemistry and Physics Discussions*, <https://doi.org/10.5194/acp-2020-686>, 2020a.
- L69: where is the GHOST data available ? If GHOST database is not publicly open, the reference of the availability of the data should remain EEA’s AQ e-reporting database. GHOST is a BSC internal on-going project currently not publicly available and a publication describing the dataset is in preparation. As explained in the text, GHOST is not another database, it ingests different air quality publicly available databases (including the EEA AQ eReporting database used in this study) and provides consistent and extended metadata to ensure the quality of the observational data. Although neglected by many studies, we consider that this quality assurance screening is an essential part of the data preprocessing. This is why we consider that it is worth mentioning and explaining it in detail in the manuscript, while to our opinion, the reference to the use of the EEA AQ eReporting database is already clear enough in the text.
- L75: the formal deadline for 2019 AQ e-reporting data to be delivered as E1a is September 2020, what is the fraction of 2019 data already E1a at the date of submission? Regarding the September deadline, it seems that many countries are actually delivering E1a data earlier (sometimes bit by bit through the year). We added the following text : *“The fraction of E1a data is 0% in 2020, 99% in 2019 and 100% in 2013-2018.”*
- L125: please clarify what you mean by “unique values”, is the date index the Julian day, and if so why would it be unique? There is here a misunderstanding. As explained in L119, the date index is the number of days since 2013/01/01 (i.e. unique values going from 0 for 2013/01/01 to 2677 for 2020/04/30), while the Julian date (going from 1 to 365) is another feature. We added this to the sentence : *“Including such a feature with unique values (going from 0 for 2013/01/01 to 2677 for 2020/04/30) is not expected [...]”*

- L145: hyperparameters should be defined and discussed either in the main text or in the annex. Further details would be appreciated in the annex on how the choice of those hyperparameters are related with the problem at hand (density and spread of observations, number and diversity of predictors etc.). The tuning strategy is explained in detail in Appendix C. The hyperparameters selected here are very common to any ML exercise with the gradient boosting machine and are not tailored to our specific problem. For each of these hyperparameters, we defined a reasonably large range of possible values to be tested through a randomized search, following again the idea we have about the common practices in the field (and the computational resources available for these calculations). We are not arguing here that this tuning strategy optimizes the best the performance but the performance obtained was found to be acceptable for the present study.
- L245: include the value of the uncertainty interval, it is difficult to compare percentages in 3.2 and ppbv intervals in 2.3.3. Actually, both should not be compared because they are not directly comparable. There is here a misunderstanding since the uncertainty intervals of Sect. 2.3.3 correspond to the uncertainties of the ML predictions at the daily and weekly scales (i.e. the uncertainties of the daily or weekly average NO<sub>2</sub> concentrations).
- L255: the impact of the LEZ could actually be an increase of NO<sub>2</sub> at stations in the outskirts of that zone. As also explained in our answer to the first reviewer, although the reviewer is right in principle, to our opinion, the 3 reasons already mentioned here in the text (namely the very limited area of this LEZ zone (5 km<sup>2</sup>), the rather large distance to the stations selected and last but not least, the expected progressive transition to a new traffic pattern, given the absence of fines before April 1<sup>st</sup>, now postponed to September 15<sup>th</sup> 2020), combined together, reasonably justify our assumption that only a “*limited impact is expected*” in Madrid.
- Figure 2: N seems to be missing from the plot. Thanks, we corrected it (this was an old version of the legend).
- L266: clarify if the confidence interval is taken from the distribution of daily differences. We are not sure to properly understand what should be clarified here. The uncertainties used here correspond to the uncertainties at weekly scale (computed based on the differences between NO<sub>2</sub> observations and predictions weekly averaged, as explained in Sect. 2.3.3). If the reviewer is talking about the uncertainties at daily scale, they are indeed obtained from the distribution of the daily differences.
- L325 and L344: could there be a role of background ozone in the relation between NO<sub>x</sub> emission changes and NO<sub>2</sub> concentrations that would appear through this latitudinal gradient? The NO<sub>2</sub> reductions obtained tend to be stronger in the southern half of Spain, but there is not a very clear latitudinal gradient that apply to all provinces. For instance, relatively lower NO<sub>2</sub> reductions are found along the southern coast of Spain. Ozone and other chemical compounds may in principle impact the

NO<sub>2</sub> concentrations (directly or indirectly) but we do not have any clear evidence for this at this stage.

- L365: clarify which reduction is for urban and traffic stations. We modified the text as follows : “On average over this set of provinces, the NO<sub>2</sub> reduction is -44 and -53% at the urban background and traffic stations, respectively [...]”
- L412: also mention day of the week in the predictors, which is presumably very important for NO<sub>2</sub>. We modified the sentence as follows : “To tackle this issue, we used ML models fed by meteorological data and time variables (Julian date, day of week and date index) to estimate [...]”

### Other modifications

Given the recent publication of a few new relevant studies on the topic (focusing on Spain), we updated some sentences in the manuscript :

- “While such an extraordinary situation has obviously impacted the levels of air pollution in the country, as seen in both surface and satellite observations (Tobías et al., 2020; Bauwens et al., 2020), the extent of such reductions remains uncertain.”
- “Actually, the lockdown offers unique opportunities for so-called dynamical CTM evaluations (Rao et al., 2011), i.e., testing the ability of CTMs to reproduce the observed changes of concentrations under unusually different emissions (Guevara et al., 2020a; Menut et al., 2020).”
- “A more detailed analysis of the activity data in these different emission sectors is required to better quantify how the emission forcing has been modified by the lockdown (Guevara et al., 2020a) and to understand the reductions of NO<sub>2</sub> obtained in this study.”
- “In a separate study, our meteorology-normalized estimates are used to quantify the circumstantial reduction in the mortality attributable to the short-term effects of NO<sub>2</sub> during the lockdown (Achebak et al., 2020).”

With the corresponding references :

- Achebak, H., Petetin, H., Quijal-Zamorano, M., Bowdalo, D., García-Pando, C. P., and Ballester, J.: Reduction in air pollution and attributable mortality due to COVID-19 lockdown, *The Lancet Planetary Health*, 4, e268, [https://doi.org/10.1016/S2542-5196\(20\)30148-0](https://doi.org/10.1016/S2542-5196(20)30148-0), <https://linkinghub.elsevier.com/retrieve/pii/S2542519620301480>, 2020.
- Bauwens, M., Compernelle, S., Stavrakou, T., Müller, J., Gent, J., Eskes, H., Levelt, P. F., van der A, R., Veefkind, J. P., Vlietinck, J., Yu, H., and Zehner, C.: Impact of Coronavirus Outbreak on NO<sub>2</sub> Pollution Assessed Using TROPOMI and OMI Observations, *Geophysical Research Letters*, 47, <https://doi.org/10.1029/2020GL087978>, <https://onlinelibrary.wiley.com/doi/abs/10.1029/2020GL087978>, 2020.
- Guevara, M., Jorba, O., Soret, A., Petetin, H., Bowdalo, D., Serradell, K., Tena, C., Denier van der Gon, H., Kuenen, J., Peuch, V.-H., and Pérez García-Pando, C.: Time-resolved emission reductions for atmospheric chemistry modelling in Europe during the COVID-19 lockdowns (in review),

Atmospheric Chemistry and Physics Discussions,  
<https://doi.org/10.5194/acp-2020-686>, 2020a

- Menut, L., Bessagnet, B., Siour, G., Mailler, S., Pennel, R., and Cholakian, A.: Impact of lockdown measures to combat Covid-19 on air quality over western Europe, *Science of The Total Environment*, 741, 140 426, <https://doi.org/10.1016/j.scitotenv.2020.140426>, <https://linkinghub.elsevier.com/retrieve/pii/S0048969720339486>, 2020.

Complete list of changes :

- Title : *“Meteorology-normalized impact of the COVID-19 lockdown upon NO<sub>2</sub> pollution in Spain”*
- Affiliations : *“ICREA, Catalan Institution for Research and Advanced Studies, Barcelona, Spain”*
- L1 : *“The spread of the new coronavirus SARS-COV-2 causing COVID-19 forced the Spanish Government [...]”*
- L10 : *“The ML predictive models were found to perform remarkably well in most locations, with overall bias, root-mean-squared error and correlation of +4%, 29% and 0.86, respectively.”*
- L24 : *“The rapid spread of the new coronavirus SARS-COV-2 that causes COVID-19 [...]”*
- L39 : *“While such an extraordinary situation has obviously impacted the levels of air pollution in the country, as seen in both surface and satellite observations (Tobias et al., 2020; Bauwens et al., 2020), the extent of such reductions remains uncertain.”*
- L45 : *“[...] testing the ability of CTMs to reproduce the observed changes of concentrations under unusually different emissions (Guevara et al., 2020b; Menut et al., 2020).”*
- L75 : *“The fraction of E1a data is 0% in 2020, 99% in 2019 and 100% in 2013-2018.”*
- L76 : *“All NO<sub>2</sub> measurements taken into account here are operated using chemiluminescence with an internal Molybdenum converter. Although predominantly used over Europe for measuring NO<sub>2</sub>, this measurement technique is well known to be have strong positive artifacts due to interferences of NO<sub>z</sub> compounds (e.g. nitric acid, peroxyacetyl nitrates, organic nitrates), especially during daytime when these species are photochemically formed, up to a factor of 2-4 as observed during summertime in urban atmospheres (e.g. Dunlea et al., 2007; Villena et al., 2012). In our case, the positive artifacts at urban background stations are probably lower since the period of study (late winter and early spring) is less photochemically active than summertime. Even lower interferences are expected at traffic stations where the NO<sub>z</sub>/NO<sub>x</sub> ratio is typically lower due to the proximity to fresh NO<sub>x</sub> emissions. In any case, the present study focuses on the relative changes of NO<sub>2</sub> due to the lockdown, so biases in the NO<sub>2</sub> measurements are of lower importance.”*
- L100 : *“ [...] total cloud cover, surface net solar radiation, surface solar radiation downwards, downward UV radiation at the surface and boundary layer height.”*
- L114 : *“Choice of features and modeling strategy”*

- L118 : “[...] total cloud cover, surface net solar radiation, surface solar radiation downwards, downward UV radiation at the surface, boundary layer height [...]”
- L124 : “Including such a feature with unique values (going from 0 for 2013/01/01 to 2669 for 2020/04/23)”
- L136 : “This ML experiment is hereafter referred to as EXP<sub>2020</sub>.”
- L155 : “These ML experiments are hereafter referred to as EXP<sub>2016</sub>, EXP<sub>2017</sub>, EXP<sub>2018</sub> and EXP<sub>2019</sub>, respectively.”
- L159 : “Averaged over all Spanish provinces, the uncertainty interval is [-5.1, +5.3] ppbv at urban background stations, and [-6.6, +6.7] ppbv at traffic stations.”
- L167 : “Because these daily uncertainties are likely at least partly uncorrelated, NO<sub>2</sub> daily predictions averaged over time periods longer than one day are expected to have smaller uncertainties due to error compensations.”
- L172 : “On average over all provinces, the weekly uncertainty interval obtained are [-3.8, +3.6] ppbv at urban background stations, and [-4.9, +4.7] ppbv at traffic stations, which represents a reduction of 28% for both types of stations, with respect to the daily uncertainties.”
- L179 : “Note that these ancillary ML experiments used here for quantifying the uncertainties also allow to evaluate the performance of our modeling strategy during the period of the year of the lockdown (as explained later in Sect. 3.1).”
- L181 : “Time series in the other 48 Spanish provinces can be found in the Supplement.”
- L186 : “The performance of the ML predictions in each Spanish province and station type is shown in Fig. 2, and the statistics over all Spanish provinces reported in Table 1. Statistical results in Table 1 are given for both the reference ML experiment (EXP<sub>2020</sub>) and the other experiments combined together (EXP<sub>2016</sub>, EXP<sub>2017</sub>, EXP<sub>2018</sub> and EXP<sub>2019</sub>, hereafter referred to as EXP<sub>2016–2019</sub>). Besides providing a broader view of the performance of our modeling strategy, considering these past experiments also allows assessing the performance of the ML predictions during the period of the year of the lockdown (14/03–30/04, for years 2016 to 2019), which may be important given the potential seasonality of prediction errors. Statistics obtained at urban background and traffic stations are given in Table A2 in Appendix.”
- L190 : “For information purposes, we included the statistical results obtained over the training dataset (2017/01/01–2019/12/31 in EXP<sub>2020</sub>). Checking results over the training data may be useful for highlighting obvious situations of overfitting, when the performance is almost perfect. At both urban background and traffic stations, results show no bias, low nRMSE (always below 35%, 19% when considering all provinces), and a high PCC of 0.96. Similar results are obtained when considering the ensemble of all past experiments (EXP<sub>2016–2019</sub>).”
- L195 : “On the test dataset of the EXP<sub>2020</sub> reference experiment (2020/01/01–2020/03/13, before the lockdown), the performance remains reasonably good in most provinces. Over all Spanish provinces, the nMB increases to +4%, the nRMSE to 29% and the PCC is reduced to 0.86, in

very close agreement with the performance obtained with EXP<sub>2016-2020</sub> (nMB of +1%, nRMSE of 28% and PCC of 0.86). In comparison, the performance obtained in EXP<sub>2016-2019</sub> during the period of the year of the lockdown (14/03-30/04) is a bit lower but remains reasonable, with a nMB of +4%, a nRMSE of 37% and a PCC of 0.80. Although moderate, such a deterioration of the performance after mid-March might reflect some seasonality in the ML model errors and/or could be related to the presence of trends in the NO<sub>2</sub> concentrations. Concerning this last point, as previously discussed in Sect. 2.3.2, including the date index feature in the ML model aims at limiting this potential issue but likely cannot completely solve it. Generally, only minor differences of performance are found between urban background and traffic stations. Results of EXP<sub>2020</sub> per province (Fig. 2) highlight some inter-regional variability of the performance, with poorer statistics in some provinces, at least for one type of station. At most stations, the bias remains below  $\pm 20\%$  while nRMSE ranges between 15 and 45% (highest nRMSE around 50% in Teruel, Tenerife and Fuerteventura). Most provinces show PCC around 0.6-0.9, with only a few exceptions below 0.6 (urban background sites in Bizkaia, Fuerteventura, Huesca and traffic sites in Granada and Gran Canaria)."

- L225 : "like in the Canary Islands (e.g. Tenerife and Fuerteventura)."
- L233 : "89% (4240 points over 4788)"
- L246 : "(nMB of -3 and +6%, nRMSE of 19 and 22%, PCC of 0.87 and 0.85, respectively)."
- L254 : "(strict enforcement through fines to offending motorists was not expected until April 1st and was finally postponed to September 15th 2020 due to the COVID-19 situation)"
- L265 : "The uncertainty at weekly scale is here used as an estimate of the uncertainty at 90% confidence level (by construction, given that they are computed as the 5th and 95th percentiles of the weekly residuals, see Sect. 2.3.3) affecting the mean NO<sub>2</sub> change."
- L267 : "-7[-13,-1] ppbv"
- L268 : "-39[-74,-4]%"
- L269 : "-10[-15,-5] ppbv, or -59[-87,-30]%"
- L276 : "(nRMSE of 25%) and correlations (PCC of 0.72)"
- L276 : "The positive bias in the traffic station started in early February and persisted during the following weeks"
- L277 : "(+0%), and reaches +8%"
- L284 : "start before April 1st (postponed to September 15th 2020 due to the COVID-19 situation)."
- L304 : "decreased by -7[-12,-2] ppbv (-47[-78,-16]%)"
- L306 : "-15[-20,-10] ppbv (-61[-80,-38]%)."
- L317 : "significance. During the lockdown period, 96% (2734 points over 2844) of the observed daily NO<sub>2</sub> mixing ratios are lower than the ML-based business-as-usual NO<sub>2</sub> estimates."
- L318 : "-4[-8,-0] ppbv (-49[-95,-0]%) in relative terms)"
- L320 : "and -1 ppbv (-31%)."
- L321 : "22 out of 38 provinces,"
- L322 : "-7[-11,-2] ppbv (or -50[-91,-8]%), and 26 out of 37 stations"



- L329 : *“about -42% at both station types, and further increased to about -54% during phases II and III.”*
- L332 : *“between -20 and -40% depending on the type of station during phases II and III, compared to only -9 to -19% during phase I.”*
- L337 : *“Barcelona Supercomputing Center (Guevara et al., 2020b).”*
- L353 : *“lockdown (Guevara et al., 2020a)”*
- L364 : *“-44 and -53% at the urban background and traffic stations, respectively”*
- L367 : *“-50 and -63% at urban background and traffic stations”*
- L368 : *“NO<sub>2</sub> reductions of -43 and -60%”*
- L382 : *“The NO<sub>2</sub> changes obtained with the climatological average approach are reported on Fig. 5 (and for the different phases in Figs. A1, A2, A3, A4 in Appendix).”*
- L391 : *“biased by +27%.”*
- L395 : *“+12, +2.3 and +1.8%”*
- L396 : *“-21/+52, -34/+44 and -41/+36% during phases I, II and III, respectively. For the case of Barcelona province, these relative biases are +35, +19 and 22%.”*
- L412 : *“fed by meteorological data and time variables (Julian date, day of week and date index)”*
- L417 : *“We also demonstrated the benefits of our meteorology-normalization approach compared to a simple climatological-based approach, especially at smaller temporal and spatial scales.”*
- L440 : *“The results of the present study provide a valuable reference for validating similar assessments of the impact of the COVID-19 lockdown on air quality based on chemistry transport models and emission scenarios derived from activity data during the lockdown (e.g. Guevara et al., 2020a; Menut et al., 2020).”*
- L441 : *“during the lockdown (Achebak et al., 2020).”*
- L442 : *“EEA AQ e-Reporting,”*
- L458 : *“All the corresponding measurements were removed from the dataset.”*

#### Figures and tables :

- We modified the color bar of Figs 1 and 6
- We reshaped Table 1 and its legend
- We added monthly climatological NO<sub>2</sub> mixing ratios on Figs. 3 and 4, and modified the legend : *“The climatological monthly averages computed over the period 2017-2019 are also shown (in black). The vertical black line identifies the beginning of the lockdown, the next dotted lines separate the different lockdown phases (phase I : 2020/03/14-2020/03/29, phase II : 2020/03/30-2020/04/09, phase III : 2020/04/10-2020/04/23).”*
- NO<sub>2</sub> changes in Table 2 have been slightly modified, according to the new results obtained with the extended set of features.
- We added the NO<sub>2</sub> changes obtained with the climatological average approach in Fig. 5 and modified the legend : *“For comparison, the mean NO<sub>2</sub> changes obtained using the climatological average (over 2017-2019)”*



*rather than ML-based business-as-usual NO2 concentration are also shown (stars), as well as the relative difference between both approaches (circles)."*

Appendix :

- Figs A1-A4 have been modified (we added information regarding NO2 changes obtained with the climatological average approach)
- Table A2 added (with detailed information about the statistical results obtained at urban background and traffic stations)

Supplement : We included the time series (similar to Figs. 3 and 4) for 48 Spanish provinces.
